# Supplementary material for: Future Range Dynamics Suggest Increasing Threats of Grey Squirrels (Sciurus carolinensis) against Red Squirrels (Sciurus vulgaris) in Europe: A Perspective on Climatic Suitability
Source: MDPI journal article supplement (doi:10.3390/f14061150), 2023-06-02
Supplement: s1 [file s1]

Archive with 3 entries (3 files):
- S1.pdf
- S2.pdf
- S3.pdf
