# Supplementary material for: Future Range Dynamics Suggest Increasing Threats of Grey Squirrels (Sciurus carolinensis) against Red Squirrels (Sciurus vulgaris) in Europe: A Perspective on Climatic Suitability
Source: MDPI journal article supplement (doi:10.3390/f14061150), 2023-06-02
Supplement: s1 [file s1]

S2-1 Correlations among the 19 climatic predictors (grey squirrels)

|       |                     | bio1     | bio10    | bio11    | bio12                 | bio13    | bio14    | bio15    | bio16    | bio17    | bio18    | bio19    | bio2                 | bio3                 | bio4     | bio5     | bio6                  | bio7     | bio8     | bio9     |
|-------|---------------------|----------|----------|----------|-----------------------|----------|----------|----------|----------|----------|----------|----------|----------------------|----------------------|----------|----------|-----------------------|----------|----------|----------|
| bio1  | Pearson Correlation | 1        | 0 0.903  | 0 0.715  | -0 0.406              | -0 0.343 | -0 0.505 | 0 0.027  | -0 0.358 | -0 0.476 | -0 0.379 | -0 0.448 | 0 0.317              | -0 0.294             | 0 0.438  | 0 0.807  | 0 0.513               | 0 0.433  | 0 0.619  | 0 0.102  |
| bio10 | Pearson Correlation | 0 0.903  | 1        | 0 0.349  | -0 0.445              | -0 0.380 | -0 0.551 | -0 0.045 | -0 0.411 | -0 0.514 | -0 0.376 | -0 0.538 | 0 0.574              | -0 0.491             | 0 0.780  | 0 0.964  | 0 0.104               | 0 0.768  | 0 0.690  | -0 0.139 |
| bio11 | Pearson Correlation | 0 0.715  | 0 0.349  | 1        | -0 0.198              | -0 0.168 | -0 0.238 | 0 0.098  | -0 0.149 | -0 0.234 | -0 0.259 | -0 0.131 | -0 0.214             | 0 0.172              | -0 0.313 | 0 0.211  | 0 0.955               | -0 0.289 | 0 0.207  | 0 0.452  |
| bio12 | Pearson Correlation | -0 0.406 | -0 0.445 | -0 0.198 | 1                     | 0 0.987  | 0 0.956  | 0 0.724  | 0 0.993  | 0 0.966  | 0 0.940  | 0 0.973  | -0 0.563             | -0 0.071             | -0 0.319 | -0 0.551 | -0 0.059 <sup>*</sup> | -0 0.438 | -0 0.286 | 0 0.318  |
| bio13 | Pearson Correlation | -0 0.343 | -0 0.380 | -0 0.168 | 0 0.987               | 1        | 0 0.913  | 0 0.798  | 0 0.995  | 0 0.928  | 0 0.906  | 0 0.962  | -0 0.550             | -0 0.123             | -0 0.272 | -0 0.497 | -0 0.047              | -0 0.399 | -0 0.238 | 0 0.343  |
| bio14 | Pearson Correlation | -0 0.505 | -0 0.551 | -0 0.238 | 0 0.956               | 0 0.913  | 1        | 0 0.562  | 0 0.929  | 0 0.989  | 0 0.925  | 0 0.936  | -0 0.568             | 0 0.028              | -0 0.400 | -0 0.631 | -0 0.079              | -0 0.497 | -0 0.392 | 0 0.284  |
| bio15 | Pearson Correlation | 0 0.027  | -0 0.045 | 0 0.098  | 0 0.724               | 0 0.798  | 0 0.562  | 1        | 0 0.787  | 0 0.571  | 0 0.583  | 0 0.715  | -0 0.438             | -0 0.222             | -0 0.112 | -0 0.211 | 0 0.130               | -0 0.243 | 0 0.009  | 0 0.513  |
| bio16 | Pearson Correlation | -0 0.358 | -0 0.411 | -0 0.149 | 0 0.993               | 0 0.995  | 0 0.929  | 0 0.787  | 1        | 0 0.940  | 0 0.911  | 0 0.975  | -0 0.578             | -0 0.096             | -0 0.316 | -0 0.528 | -0 0.017              | -0 0.440 | -0 0.266 | 0 0.365  |
| bio17 | Pearson Correlation | -0 0.476 | -0 0.514 | -0 0.234 | 0 0.966               | 0 0.928  | 0 0.989  | 0 0.571  | 0 0.940  | 1        | 0 0.936  | 0 0.941  | -0 0.548             | -0 0.002             | -0 0.365 | -0 0.594 | -0 0.083              | -0 0.464 | -0 0.367 | 0 0.305  |
| bio18 | Pearson Correlation | -0 0.379 | -0 0.376 | -0 0.259 | 0 0.940               | 0 0.906  | 0 0.925  | 0 0.583  | 0 0.911  | 0 0.936  | 1        | 0 0.855  | -0 0.497             | -0 0.150             | -0 0.210 | -0 0.477 | -0 0.142              | -0 0.336 | -0 0.156 | 0 0.136  |
| bio19 | Pearson Correlation | -0 0.448 | -0 0.538 | -0 0.131 | 0 0.973               | 0 0.962  | 0 0.936  | 0 0.715  | 0 0.975  | 0 0.941  | 0 0.855  | 1        | -0 0.625             | 0 0.044              | -0 0.457 | -0 0.637 | 0 0.034               | -0 0.558 | -0 0.411 | 0 0.423  |
| bio2  | Pearson Correlation | 0 0.317  | 0 0.574  | -0 0.214 | -0 0.563              | -0 0.550 | -0 0.568 | -0 0.438 | -0 0.578 | -0 0.548 | -0 0.497 | -0 0.625 | 1                    | 0 0.061 <sup>*</sup> | 0 0.722  | 0 0.753  | -0 0.448              | 0 0.859  | 0 0.336  | -0 0.381 |
| bio3  | Pearson Correlation | -0 0.294 | -0 0.491 | 0 0.172  | -0 0.071              | -0 0.123 | 0 0.028  | -0 0.222 | -0 0.096 | -0 0.002 | -0 0.150 | 0 0.044  | 0 0.061 <sup>*</sup> | 1                    | -0 0.619 | -0 0.397 | 0 0.224               | -0 0.447 | -0 0.380 | 0 0.208  |
| bio4  | Pearson Correlation | 0 0.438  | 0 0.780  | -0 0.313 | -0 0.319              | -0 0.272 | -0 0.400 | -0 0.112 | -0 0.316 | -0 0.365 | -0 0.210 | -0 0.457 | 0 0.722              | -0 0.619             | 1        | 0 0.837  | -0 0.531              | 0 0.971  | 0 0.560  | -0 0.442 |
| bio5  | Pearson Correlation | 0 0.807  | 0 0.964  | 0 0.211  | -0 0.551              | -0 0.497 | -0 0.631 | -0 0.211 | -0 0.528 | -0 0.594 | -0 0.477 | -0 0.637 | 0 0.753              | -0 0.397             | 0 0.837  | 1        | -0 0.046              | 0 0.872  | 0 0.625  | -0 0.235 |
| bio6  | Pearson Correlation | 0 0.513  | 0 0.104  | 0 0.955  | -0 0.059 <sup>*</sup> | -0 0.047 | -0 0.079 | 0 0.130  | -0 0.017 | -0 0.083 | -0 0.142 | 0 0.034  | -0 0.448             | 0 0.224              | -0 0.531 | -0 0.046 | 1                     | -0 0.530 | 0 0.028  | 0 0.501  |
| bio7  | Pearson Correlation | 0 0.433  | 0 0.768  | -0 0.289 | -0 0.438              | -0 0.399 | -0 0.497 | -0 0.243 | -0 0.440 | -0 0.464 | -0 0.336 | -0 0.558 | 0 0.859              | -0 0.447             | 0 0.971  | 0 0.872  | -0 0.530              | 1        | 0 0.517  | -0 0.445 |
| bio8  | Pearson Correlation | 0 0.619  | 0 0.690  | 0 0.207  | -0 0.286              | -0 0.238 | -0 0.392 | 0 0.009  | -0 0.266 | -0 0.367 | -0 0.156 | -0 0.411 | 0 0.336              | -0 0.380             | 0 0.560  | 0 0.625  | 0 0.028               | 0 0.517  | 1        | -0 0.263 |
| bio9  | Pearson Correlation | 0 0.102  | -0 0.139 | 0 0.452  | 0 0.318               | 0 0.343  | 0 0.284  | 0 0.513  | 0 0.365  | 0 0.305  | 0 0.136  | 0 0.423  | -0 0.381             | 0 0.208              | -0 0.442 | -0 0.235 | 0 0.501               | -0 0.445 | -0 0.263 | 1        |

S2-2 Correlations among the 19 climatic predictors (red squirrels)

|       |                     | bio1    | bio10   | bio11   | bio12   | bio13   | bio14   | bio15   | bio16   | bio17   | bio18   | bio19   | bio2    | bio3    | bio4    | bio5    | bio6    | bio7    | bio8    | bio9    |
|-------|---------------------|---------|---------|---------|---------|---------|---------|---------|---------|---------|---------|---------|---------|---------|---------|---------|---------|---------|---------|---------|
| bio1  | Pearson Correlation | 1       | 0.854   | 0.943   | - 0.012 | - 0.029 | - 0.078 | - 0.071 | - 0.032 | - 0.026 | - 0.459 | 0.158   | 0.374   | 0.755   | - 0.579 | 0.761   | 0.906   | - 0.411 | 0.062   | 0.792   |
| bio10 | Pearson Correlation | 0.854   | 1       | 0.639   | - 0.325 | - 0.281 | - 0.390 | 0.069   | - 0.301 | - 0.343 | - 0.562 | - 0.182 | 0.588   | 0.439   | - 0.075 | 0.964   | 0.564   | 0.105   | 0.368   | 0.569   |
| bio11 | Pearson Correlation | 0.943   | 0.639   | 1       | 0.179   | 0.128   | 0.111   | - 0.137 | 0.135   | 0.163   | - 0.357 | 0.351   | 0.199   | 0.845   | - 0.815 | 0.530   | 0.988   | - 0.668 | - 0.162 | 0.839   |
| bio12 | Pearson Correlation | - 0.012 | - 0.325 | 0.179   | 1       | 0.954   | 0.809   | - 0.001 | 0.965   | 0.856   | 0.642   | 0.923   | - 0.379 | 0.188   | - 0.474 | - 0.404 | 0.231   | - 0.544 | - 0.501 | 0.185   |
| bio13 | Pearson Correlation | - 0.029 | - 0.281 | 0.128   | 0.954   | 1       | 0.633   | 0.263   | 0.994   | 0.691   | 0.587   | 0.902   | - 0.321 | 0.137   | - 0.376 | - 0.352 | 0.164   | - 0.434 | - 0.408 | 0.168   |
| bio14 | Pearson Correlation | - 0.078 | - 0.390 | 0.111   | 0.809   | 0.633   | 1       | - 0.501 | 0.656   | 0.983   | 0.719   | 0.644   | - 0.421 | 0.136   | - 0.435 | - 0.465 | 0.185   | - 0.539 | - 0.451 | 0.028   |
| bio15 | Pearson Correlation | - 0.071 | 0.069   | - 0.137 | - 0.001 | 0.263   | - 0.501 | 1       | 0.240   | - 0.462 | - 0.133 | 0.087   | 0.153   | - 0.111 | 0.229   | 0.099   | - 0.193 | 0.279   | 0.145   | 0.007   |
| bio16 | Pearson Correlation | - 0.032 | - 0.301 | 0.135   | 0.965   | 0.994   | 0.656   | 0.240   | 1       | 0.707   | 0.600   | 0.913   | - 0.347 | 0.146   | - 0.400 | - 0.376 | 0.176   | - 0.464 | - 0.425 | 0.161   |
| bio17 | Pearson Correlation | - 0.026 | - 0.343 | 0.163   | 0.856   | 0.691   | 0.983   | - 0.462 | 0.707   | 1       | 0.699   | 0.701   | - 0.384 | 0.178   | - 0.467 | - 0.419 | 0.230   | - 0.553 | - 0.480 | 0.105   |
| bio18 | Pearson Correlation | - 0.459 | - 0.562 | - 0.357 | 0.642   | 0.587   | 0.719   | - 0.133 | 0.600   | 0.699   | 1       | 0.331   | - 0.401 | - 0.278 | 0.040   | - 0.596 | - 0.298 | - 0.118 | - 0.048 | - 0.475 |
| bio19 | Pearson Correlation | 0.158   | - 0.182 | 0.351   | 0.923   | 0.902   | 0.644   | 0.087   | 0.913   | 0.701   | 0.331   | 1       | - 0.323 | 0.333   | - 0.590 | - 0.268 | 0.395   | - 0.619 | - 0.590 | 0.409   |
| bio2  | Pearson Correlation | 0.374   | 0.588   | 0.199   | - 0.379 | - 0.321 | - 0.421 | 0.153   | - 0.347 | - 0.384 | - 0.401 | - 0.323 | 1       | 0.453   | 0.183   | 0.762   | 0.070   | 0.484   | 0.283   | 0.284   |
| bio3  | Pearson Correlation | 0.755   | 0.439   | 0.845   | 0.188   | 0.137   | 0.136   | - 0.111 | 0.146   | 0.178   | - 0.278 | 0.333   | 0.453   | 1       | - 0.767 | 0.434   | 0.802   | - 0.540 | - 0.221 | 0.745   |
| bio4  | Pearson Correlation | - 0.579 | - 0.075 | - 0.815 | - 0.474 | - 0.376 | - 0.435 | 0.229   | - 0.400 | - 0.467 | 0.040   | - 0.590 | 0.183   | - 0.767 | 1       | 0.039   | - 0.856 | 0.944   | 0.483   | - 0.655 |
| bio5  | Pearson Correlation | 0.761   | 0.964   | 0.530   | - 0.404 | - 0.352 | - 0.465 | 0.099   | - 0.376 | - 0.419 | - 0.596 | - 0.268 | 0.762   | 0.434   | 0.039   | 1       | 0.435   | 0.269   | 0.374   | 0.518   |
| bio6  | Pearson Correlation | 0.906   | 0.564   | 0.988   | 0.231   | 0.164   | 0.185   | - 0.193 | 0.176   | 0.230   | - 0.298 | 0.395   | 0.070   | 0.802   | - 0.856 | 0.435   | 1       | - 0.751 | - 0.204 | 0.804   |
| bio7  | Pearson Correlation | - 0.411 | 0.105   | - 0.668 | - 0.544 | - 0.434 | - 0.539 | 0.279   | - 0.464 | - 0.553 | - 0.118 | - 0.619 | 0.484   | - 0.540 | 0.944   | 0.269   | - 0.751 | 1       | 0.493   | - 0.479 |
| bio8  | Pearson Correlation | 0.062   | 0.368   | - 0.162 | - 0.501 | - 0.408 | - 0.451 | 0.145   | - 0.425 | - 0.480 | - 0.048 | - 0.590 | 0.283   | - 0.221 | 0.483   | 0.374   | - 0.204 | 0.493   | 1       | - 0.339 |
| bio9  | Pearson Correlation | 0.792   | 0.569   | 0.839   | 0.185   | 0.168   | 0.028   | 0.007   | 0.161   | 0.105   | - 0.475 | 0.409   | 0.284   | 0.745   | - 0.655 | 0.518   | 0.804   | - 0.479 | - 0.339 | 1       |

bio1 = annual mean temperature  
bio2 = mean diurnal range (mean of monthly (max temp - min temp))  
bio3 = isothermality (bio2/bio7) (x100)  
bio4 = temperature seasonality (standard deviation x100)  
bio5 = max temperature of the warmest month  
bio6 = min temperature of the coldest month  
bio7 = temperature annual range (bio5-bio6)  
bio8 = mean temperature of the wettest quarter  
bio9 = mean temperature of the driest quarter  
bio10 = mean temperature of the warmest quarter  
bio11 = mean temperature of the coldest quarter  
bio12 = annual precipitation  
bio13 = precipitation of the wettest month  
bio14 = precipitation of the driest month  
bio15 = precipitation seasonality (coefficient of variation)  
bio16 = precipitation of the wettest quarter  
bio17 = precipitation of the driest quarter  
bio18 = precipitation of the warmest quarter  
bio19 = precipitation of the coldest quarter
