# Supplementary material for: Future Range Dynamics Suggest Increasing Threats of Grey Squirrels (Sciurus carolinensis) against Red Squirrels (Sciurus vulgaris) in Europe: A Perspective on Climatic Suitability
Source: MDPI journal article supplement (doi:10.3390/f14061150), 2023-06-02
Supplement: s1 [file s1 › S1.pdf]

S1 Importance value of each predictors in the preliminary ecological niche models

| Bioclimatic variables                                      | <i>Sciurus carolinensis</i> | <i>Sciurus vulgaris</i> |
|------------------------------------------------------------|-----------------------------|-------------------------|
| Annual mean temperature                                    | 0.077                       | 0.252                   |
| Mean diurnal range(mean of monthly(max temp-min temp))     | 0.067                       | 0.110                   |
| Isothermality(bio2/bio7)( $\times 100$ )                   | 0.183                       | 0.084                   |
| Temperature seasonality (standard deviation $\times 100$ ) | 0.556                       | 0.704                   |
| Max temperature of the warmest month                       | 0.117                       | 0.125                   |
| Min temperature of the coldest month                       | 0.101                       | 0.106                   |
| Temperature annual range(bio5-bio6)                        | 0.096                       | 0.220                   |
| Mean temperature of the wettest quarter                    | 0.013                       | 0.021                   |
| Mean temperature of the driest quarter                     | 0.099                       | 0.036                   |
| Mean temperature of the warmest quarter                    | 0.110                       | 0.390                   |
| Mean temperature of the coldest quarter                    | 0.169                       | 0.153                   |
| Annual precipitation                                       | 0.075                       | 0.151                   |
| Precipitation of the wettest month                         | 0.050                       | 0.043                   |
| Precipitation of the driest month                          | 0.026                       | 0.030                   |
| Precipitation seasonality                                  | 0.017                       | 0.034                   |
| Precipitation of the wettest quarter                       | 0.103                       | 0.068                   |
| Precipitation of the driest quarter                        | 0.090                       | 0.105                   |
| Precipitation of the warmest quarter                       | 0.051                       | 0.033                   |
| Precipitation of the coldest quarter                       | 0.082                       | 0.029                   |
