# Supplementary material for: Future Range Dynamics Suggest Increasing Threats of Grey Squirrels (Sciurus carolinensis) against Red Squirrels (Sciurus vulgaris) in Europe: A Perspective on Climatic Suitability
Source: MDPI journal article supplement (doi:10.3390/f14061150), 2023-06-02
Supplement: s1 [file s1 › S3.pdf]

S3 The retained predictors in final ecological niche models

| Grey squirrels in Europe                |            | Red squirrels in Europe                 |            |
|-----------------------------------------|------------|-----------------------------------------|------------|
| Predictors                              | Importance | Predictors                              | Importance |
| Isothermality                           | 0.169      | Mean diurnal range                      | 0.032      |
| Temperature seasonality deviation×100)  | 0.328      | Temperature seasonality                 | 0.638      |
| Mean temperature of the wettest quarter | 0.016      | Mean temperature of the wettest quarter | 0.038      |
| Mean temperature of the driest quarter  | 0.093      | Mean temperature of the driest quarter  | 0.079      |
| Mean temperature of the coldest quarter | 0.474      | Mean temperature of the warmest         | 0.109      |
| Precipitation of the wettest quarter    | 0.011      | Annual precipitation                    | 0.075      |
|                                         |            | Precipitation seasonality               | 0.031      |
|                                         |            | Precipitation of the warmest quarter    | 0.038      |
